# Supplementary material for: Human polyomaviruses identification by logic mining techniques
Source: Virol J. 2012 Mar 2;9:58. doi: 10.1186/1743-422X-9-58 (PMC3307486; doi:10.1186/1743-422X-9-58)
Supplement: Additional file 2 — Separating formulas for LT gene region. All the discriminating base pairs for the virus classification within the gene region LT. [file 1743-422X-9-58-S2.XLS]

## Sheet: LT
CLASS 1:	KIVLT
	(pos608=T)	Coverage: 1.00
CLASS 2:	MCVLT
	(pos608=C)	Coverage: 1.00
CLASS 3:	WUVLT
	(pos608=G)	Coverage: 1.00
OR
CLASS 1:	KIVLT
	(pos718=G)	Coverage: 1.00
CLASS 2:	MCVLT
	(pos718=C)	Coverage: 1.00
CLASS 3:	WUVLT
	(pos718=T)	Coverage: 1.00
OR
CLASS 1:	KIVLT
	(pos728=G)	Coverage: 1.00
CLASS 2:	MCVLT
	(pos728=C)	Coverage: 1.00
CLASS 3:	WUVLT
	(pos728=T)	Coverage: 1.00
OR
CLASS 1:	KIVLT
	(pos783=A)	Coverage: 1.00
CLASS 2:	MCVLT
	(pos783=C)	Coverage: 1.00
CLASS 3:	WUVLT
	(pos783=T)	Coverage: 1.00
OR
CLASS 1:	KIVLT
	(pos683=G)	Coverage: 1.00
CLASS 2:	MCVLT
	(pos683=A)	Coverage: 1.00
CLASS 3:	WUVLT
	(pos683=T)	Coverage: 1.00
OR
CLASS 1:	KIVLT
	(pos820=G)	Coverage: 1.00
CLASS 2:	MCVLT
	(pos820=C)	Coverage: 1.00
CLASS 3:	WUVLT
	(pos820=T)	Coverage: 1.00
OR
CLASS 1:	KIVLT
	(pos207=A)	Coverage: 1.00
CLASS 2:	MCVLT
	(pos207=C)	Coverage: 1.00
CLASS 3:	WUVLT
	(pos207=G)	Coverage: 1.00
OR
CLASS 1:	KIVLT
	(pos243=A)	Coverage: 1.00
CLASS 2:	MCVLT
	(pos243=G)	Coverage: 1.00
CLASS 3:	WUVLT
	(pos243=C)	Coverage: 1.00
OR
CLASS 1:	KIVLT
	(pos537=A)	Coverage: 1.00
CLASS 2:	MCVLT
	(pos537=C)	Coverage: 1.00
CLASS 3:	WUVLT
	(pos537=T)	Coverage: 1.00
OR
CLASS 1:	KIVLT
	(pos417=T)	Coverage: 1.00
CLASS 2:	MCVLT
	(pos417=G)	Coverage: 1.00
CLASS 3:	WUVLT
	(pos417=A)	Coverage: 1.00
OR
CLASS 1:	KIVLT
	(pos192=C)	Coverage: 1.00
CLASS 2:	MCVLT
	(pos192=A)	Coverage: 1.00
CLASS 3:	WUVLT
	(pos192=G)	Coverage: 1.00
OR
CLASS 1:	KIVLT
	(pos611=T)	Coverage: 1.00
CLASS 2:	MCVLT
	(pos611=G)	Coverage: 1.00
CLASS 3:	WUVLT
	(pos611=A)	Coverage: 1.00
OR
CLASS 1:	KIVLT
	(pos825=T)	Coverage: 1.00
CLASS 2:	MCVLT
	(pos825=C)	Coverage: 1.00
CLASS 3:	WUVLT
	(pos825=A)	Coverage: 1.00
OR
CLASS 1:	KIVLT
	(pos406=A)	Coverage: 1.00
CLASS 2:	MCVLT
	(pos406=C)	Coverage: 1.00
CLASS 3:	WUVLT
	(pos406=T)	Coverage: 1.00
OR
CLASS 1:	KIVLT
	(pos640=G)	Coverage: 1.00
CLASS 2:	MCVLT
	(pos640=T)	Coverage: 1.00
CLASS 3:	WUVLT
	(pos640=A)	Coverage: 1.00
OR
CLASS 1:	KIVLT
	(pos459=G)	Coverage: 1.00
CLASS 2:	MCVLT
	(pos459=T)	Coverage: 1.00
CLASS 3:	WUVLT
	(pos459=A)	Coverage: 1.00
OR
CLASS 1:	KIVLT
	(pos507=A)	Coverage: 1.00
CLASS 2:	MCVLT
	(pos507=G)	Coverage: 1.00
CLASS 3:	WUVLT
	(pos507=T)	Coverage: 1.00
OR
CLASS 1:	KIVLT
	(pos759=T)	Coverage: 1.00
CLASS 2:	MCVLT
	(pos759=A)	Coverage: 1.00
CLASS 3:	WUVLT
	(pos759=G)	Coverage: 1.00
OR
CLASS 1:	KIVLT
	(pos424=G)	Coverage: 1.00
CLASS 2:	MCVLT
	(pos424=T)	Coverage: 1.00
CLASS 3:	WUVLT
	(pos424=A)	Coverage: 1.00
OR
CLASS 1:	KIVLT
	(pos214=T)	Coverage: 1.00
CLASS 2:	MCVLT
	(pos214=G)	Coverage: 1.00
CLASS 3:	WUVLT
	(pos214=C)	Coverage: 1.00
OR
CLASS 1:	KIVLT
	(pos674=G)	Coverage: 1.00
CLASS 2:	MCVLT
	(pos674=C)	Coverage: 1.00
CLASS 3:	WUVLT
	(pos674=T)	Coverage: 1.00
OR
CLASS 1:	KIVLT
	(pos103=T)	Coverage: 1.00
CLASS 2:	MCVLT
	(pos103=A)	Coverage: 1.00
CLASS 3:	WUVLT
	(pos103=C)	Coverage: 1.00
OR
CLASS 1:	KIVLT
	(pos336=A)	Coverage: 1.00
CLASS 2:	MCVLT
	(pos336=C)	Coverage: 1.00
CLASS 3:	WUVLT
	(pos336=G)	Coverage: 1.00
OR
CLASS 1:	KIVLT
	(pos714=T)	Coverage: 1.00
CLASS 2:	MCVLT
	(pos714=C)	Coverage: 1.00
CLASS 3:	WUVLT
	(pos714=A)	Coverage: 1.00
OR
CLASS 1:	KIVLT
	(pos468=A)	Coverage: 1.00
CLASS 2:	MCVLT
	(pos468=C)	Coverage: 1.00
CLASS 3:	WUVLT
	(pos468=T)	Coverage: 1.00
OR
CLASS 1:	KIVLT
	(pos304=A)	Coverage: 1.00
CLASS 2:	MCVLT
	(pos304=G)	Coverage: 1.00
CLASS 3:	WUVLT
	(pos304=T)	Coverage: 1.00
OR
CLASS 1:	KIVLT
	(pos458=A)	Coverage: 1.00
CLASS 2:	MCVLT
	(pos458=C)	Coverage: 1.00
CLASS 3:	WUVLT
	(pos458=T)	Coverage: 1.00
OR
CLASS 1:	KIVLT
	(pos411=A)	Coverage: 1.00
CLASS 2:	MCVLT
	(pos411=C)	Coverage: 1.00
CLASS 3:	WUVLT
	(pos411=G)	Coverage: 1.00
OR
CLASS 1:	KIVLT
	(pos556=C)	Coverage: 1.00
CLASS 2:	MCVLT
	(pos556=T)	Coverage: 1.00
CLASS 3:	WUVLT
	(pos556=G)	Coverage: 1.00
OR
CLASS 1:	KIVLT
	(pos696=T)	Coverage: 1.00
CLASS 2:	MCVLT
	(pos696=G)	Coverage: 1.00
CLASS 3:	WUVLT
	(pos696=C)	Coverage: 1.00
OR
CLASS 1:	KIVLT
	(pos800=A)	Coverage: 1.00
CLASS 2:	MCVLT
	(pos800=C)	Coverage: 1.00
CLASS 3:	WUVLT
	(pos800=G)	Coverage: 1.00
OR
CLASS 1:	KIVLT
	(pos562=T)	Coverage: 1.00
CLASS 2:	MCVLT
	(pos562=A)	Coverage: 1.00
CLASS 3:	WUVLT
	(pos562=C)	Coverage: 1.00
OR
CLASS 1:	KIVLT
	(pos716=A)	Coverage: 1.00
CLASS 2:	MCVLT
	(pos716=C)	Coverage: 1.00
CLASS 3:	WUVLT
	(pos716=T)	Coverage: 1.00
OR
CLASS 1:	KIVLT
	(pos354=A)	Coverage: 1.00
CLASS 2:	MCVLT
	(pos354=C)	Coverage: 1.00
CLASS 3:	WUVLT
	(pos354=T)	Coverage: 1.00
OR
CLASS 1:	KIVLT
	(pos746=C)	Coverage: 1.00
CLASS 2:	MCVLT
	(pos746=A)	Coverage: 1.00
CLASS 3:	WUVLT
	(pos746=T)	Coverage: 1.00
OR
CLASS 1:	KIVLT
	(pos710=A)	Coverage: 1.00
CLASS 2:	MCVLT
	(pos710=G)	Coverage: 1.00
CLASS 3:	WUVLT
	(pos710=T)	Coverage: 1.00
OR
CLASS 1:	KIVLT
	(pos734=T)	Coverage: 1.00
CLASS 2:	MCVLT
	(pos734=C)	Coverage: 1.00
CLASS 3:	WUVLT
	(pos734=A)	Coverage: 1.00
OR
CLASS 1:	KIVLT
	(pos604=G)	Coverage: 1.00
CLASS 2:	MCVLT
	(pos604=T)	Coverage: 1.00
CLASS 3:	WUVLT
	(pos604=A)	Coverage: 1.00
OR
CLASS 1:	KIVLT
	(pos541=T)	Coverage: 1.00
CLASS 2:	MCVLT
	(pos541=G)	Coverage: 1.00
CLASS 3:	WUVLT
	(pos541=A)	Coverage: 1.00
OR
CLASS 1:	KIVLT
	(pos793=G)	Coverage: 1.00
CLASS 2:	MCVLT
	(pos793=T)	Coverage: 1.00
CLASS 3:	WUVLT
	(pos793=A)	Coverage: 1.00
OR
CLASS 1:	KIVLT
	(pos506=T)	Coverage: 1.00
CLASS 2:	MCVLT
	(pos506=A)	Coverage: 1.00
CLASS 3:	WUVLT
	(pos506=G)	Coverage: 1.00
OR
CLASS 1:	KIVLT
	(pos766=A)	Coverage: 1.00
CLASS 2:	MCVLT
	(pos766=T)	Coverage: 1.00
CLASS 3:	WUVLT
	(pos766=G)	Coverage: 1.00
OR
CLASS 1:	KIVLT
	(pos395=C)	Coverage: 1.00
CLASS 2:	MCVLT
	(pos395=G)	Coverage: 1.00
CLASS 3:	WUVLT
	(pos395=A)	Coverage: 1.00
OR
CLASS 1:	KIVLT
	(pos702=A)	Coverage: 1.00
CLASS 2:	MCVLT
	(pos702=C)	Coverage: 1.00
CLASS 3:	WUVLT
	(pos702=T)	Coverage: 1.00
OR
CLASS 1:	KIVLT
	(pos740=G)	Coverage: 1.00
CLASS 2:	MCVLT
	(pos740=C)	Coverage: 1.00
CLASS 3:	WUVLT
	(pos740=A)	Coverage: 1.00
OR
CLASS 1:	KIVLT
	(pos438=A)	Coverage: 1.00
CLASS 2:	MCVLT
	(pos438=G)	Coverage: 1.00
CLASS 3:	WUVLT
	(pos438=C)	Coverage: 1.00
OR
CLASS 1:	KIVLT
	(pos805=G)	Coverage: 1.00
CLASS 2:	MCVLT
	(pos805=C)	Coverage: 1.00
CLASS 3:	WUVLT
	(pos805=T)	Coverage: 1.00
OR
CLASS 1:	KIVLT
	(pos802=C)	Coverage: 1.00
CLASS 2:	MCVLT
	(pos802=A)	Coverage: 1.00
CLASS 3:	WUVLT
	(pos802=G)	Coverage: 1.00
OR
CLASS 1:	KIVLT
	(pos543=T)	Coverage: 1.00
CLASS 2:	MCVLT
	(pos543=G)	Coverage: 1.00
CLASS 3:	WUVLT
	(pos543=C)	Coverage: 1.00
OR
CLASS 1:	KIVLT
	(pos536=T)	Coverage: 1.00
CLASS 2:	MCVLT
	(pos536=G)	Coverage: 1.00
CLASS 3:	WUVLT
	(pos536=A)	Coverage: 1.00
OR
CLASS 1:	KIVLT
	(pos210=T)	Coverage: 1.00
CLASS 2:	MCVLT
	(pos210=A)	Coverage: 1.00
CLASS 3:	WUVLT
	(pos210=C)	Coverage: 1.00
OR
CLASS 1:	KIVLT
	(pos474=T)	Coverage: 1.00
CLASS 2:	MCVLT
	(pos474=C)	Coverage: 1.00
CLASS 3:	WUVLT
	(pos474=A)	Coverage: 1.00
OR
CLASS 1:	KIVLT
	(pos824=C)	Coverage: 1.00
CLASS 2:	MCVLT
	(pos824=T)	Coverage: 1.00
CLASS 3:	WUVLT
	(pos824=A)	Coverage: 1.00
OR
CLASS 1:	KIVLT
	(pos36=G)	Coverage: 1.00
CLASS 2:	MCVLT
	(pos36=T)	Coverage: 1.00
CLASS 3:	WUVLT
	(pos36=A)	Coverage: 1.00
OR
CLASS 1:	KIVLT
	(pos553=C)	Coverage: 1.00
CLASS 2:	MCVLT
	(pos553=A)	Coverage: 1.00
CLASS 3:	WUVLT
	(pos553=G)	Coverage: 1.00
OR
CLASS 1:	KIVLT
	(pos375=G)	Coverage: 1.00
CLASS 2:	MCVLT
	(pos375=A)	Coverage: 1.00
CLASS 3:	WUVLT
	(pos375=T)	Coverage: 1.00
OR
CLASS 1:	KIVLT
	(pos625=C)	Coverage: 1.00
CLASS 2:	MCVLT
	(pos625=T)	Coverage: 1.00
CLASS 3:	WUVLT
	(pos625=A)	Coverage: 1.00
OR
CLASS 1:	KIVLT
	(pos65=G)	Coverage: 1.00
CLASS 2:	MCVLT
	(pos65=A)	Coverage: 1.00
CLASS 3:	WUVLT
	(pos65=C)	Coverage: 1.00
OR
CLASS 1:	KIVLT
	(pos659=T)	Coverage: 1.00
CLASS 2:	MCVLT
	(pos659=C)	Coverage: 1.00
CLASS 3:	WUVLT
	(pos659=A)	Coverage: 1.00
OR
CLASS 1:	KIVLT
	(pos339=C)	Coverage: 1.00
CLASS 2:	MCVLT
	(pos339=G)	Coverage: 1.00
CLASS 3:	WUVLT
	(pos339=A)	Coverage: 1.00
OR
CLASS 1:	KIVLT
	(pos430=T)	Coverage: 1.00
CLASS 2:	MCVLT
	(pos430=G)	Coverage: 1.00
CLASS 3:	WUVLT
	(pos430=A)	Coverage: 1.00
OR
CLASS 1:	KIVLT
	(pos684=C)	Coverage: 1.00
CLASS 2:	MCVLT
	(pos684=G)	Coverage: 1.00
CLASS 3:	WUVLT
	(pos684=T)	Coverage: 1.00
OR
CLASS 1:	KIVLT
	(pos773=C)	Coverage: 1.00
CLASS 2:	MCVLT
	(pos773=A)	Coverage: 1.00
CLASS 3:	WUVLT
	(pos773=T)	Coverage: 1.00
OR
CLASS 1:	KIVLT
	(pos743=A)	Coverage: 1.00
CLASS 2:	MCVLT
	(pos743=C)	Coverage: 1.00
CLASS 3:	WUVLT
	(pos743=G)	Coverage: 1.00
OR
CLASS 1:	KIVLT
	(pos204=T)	Coverage: 1.00
CLASS 2:	MCVLT
	(pos204=G)	Coverage: 1.00
CLASS 3:	WUVLT
	(pos204=A)	Coverage: 1.00
OR
CLASS 1:	KIVLT
	(pos755=T)	Coverage: 1.00
CLASS 2:	MCVLT
	(pos755=C)	Coverage: 1.00
CLASS 3:	WUVLT
	(pos755=G)	Coverage: 1.00
OR
CLASS 1:	KIVLT
	(pos194=C)	Coverage: 1.00
CLASS 2:	MCVLT
	(pos194=A)	Coverage: 1.00
CLASS 3:	WUVLT
	(pos194=G)	Coverage: 1.00
OR
CLASS 1:	KIVLT
	(pos587=A)	Coverage: 1.00
CLASS 2:	MCVLT
	(pos587=C)	Coverage: 1.00
CLASS 3:	WUVLT
	(pos587=T)	Coverage: 1.00
OR
CLASS 1:	KIVLT
	(pos455=T)	Coverage: 1.00
CLASS 2:	MCVLT
	(pos455=A)	Coverage: 1.00
CLASS 3:	WUVLT
	(pos455=C)	Coverage: 1.00
OR
CLASS 1:	KIVLT
	(pos826=A)	Coverage: 1.00
CLASS 2:	MCVLT
	(pos826=T)	Coverage: 1.00
CLASS 3:	WUVLT
	(pos826=G)	Coverage: 1.00
OR
CLASS 1:	KIVLT
	(pos744=A)	Coverage: 1.00
CLASS 2:	MCVLT
	(pos744=C)	Coverage: 1.00
CLASS 3:	WUVLT
	(pos744=T)	Coverage: 1.00
OR
CLASS 1:	KIVLT
	(pos697=A)	Coverage: 1.00
CLASS 2:	MCVLT
	(pos697=C)	Coverage: 1.00
CLASS 3:	WUVLT
	(pos697=T)	Coverage: 1.00
OR
CLASS 1:	KIVLT
	(pos682=A)	Coverage: 1.00
CLASS 2:	MCVLT
	(pos682=G)	Coverage: 1.00
CLASS 3:	WUVLT
	(pos682=T)	Coverage: 1.00
OR
CLASS 1:	KIVLT
	(pos698=A)	Coverage: 1.00
CLASS 2:	MCVLT
	(pos698=C)	Coverage: 1.00
CLASS 3:	WUVLT
	(pos698=G)	Coverage: 1.00
OR
CLASS 1:	KIVLT
	(pos812=T)	Coverage: 1.00
CLASS 2:	MCVLT
	(pos812=C)	Coverage: 1.00
CLASS 3:	WUVLT
	(pos812=A)	Coverage: 1.00
OR
CLASS 1:	KIVLT
	(pos530=G)	Coverage: 1.00
CLASS 2:	MCVLT
	(pos530=C)	Coverage: 1.00
CLASS 3:	WUVLT
	(pos530=T)	Coverage: 1.00
OR
CLASS 1:	KIVLT
	(pos435=A)	Coverage: 1.00
CLASS 2:	MCVLT
	(pos435=T)	Coverage: 1.00
CLASS 3:	WUVLT
	(pos435=G)	Coverage: 1.00
OR
CLASS 1:	KIVLT
	(pos512=A)	Coverage: 1.00
CLASS 2:	MCVLT
	(pos512=C)	Coverage: 1.00
CLASS 3:	WUVLT
	(pos512=G)	Coverage: 1.00
OR
CLASS 1:	KIVLT
	(pos745=C)	Coverage: 1.00
CLASS 2:	MCVLT
	(pos745=G)	Coverage: 1.00
CLASS 3:	WUVLT
	(pos745=T)	Coverage: 1.00
OR
CLASS 1:	KIVLT
	(pos828=G)	Coverage: 1.00
CLASS 2:	MCVLT
	(pos828=A)	Coverage: 1.00
CLASS 3:	WUVLT
	(pos828=T)	Coverage: 1.00
OR
CLASS 1:	KIVLT
	(pos526=A)	Coverage: 1.00
CLASS 2:	MCVLT
	(pos526=G)	Coverage: 1.00
CLASS 3:	WUVLT
	(pos526=T)	Coverage: 1.00
OR
CLASS 1:	KIVLT
	(pos499=T)	Coverage: 1.00
CLASS 2:	MCVLT
	(pos499=C)	Coverage: 1.00
CLASS 3:	WUVLT
	(pos499=G)	Coverage: 1.00
OR
CLASS 1:	KIVLT
	(pos440=T)	Coverage: 1.00
CLASS 2:	MCVLT
	(pos440=C)	Coverage: 1.00
CLASS 3:	WUVLT
	(pos440=A)	Coverage: 1.00
OR
CLASS 1:	KIVLT
	(pos569=G)	Coverage: 1.00
CLASS 2:	MCVLT
	(pos569=C)	Coverage: 1.00
CLASS 3:	WUVLT
	(pos569=A)	Coverage: 1.00
OR
CLASS 1:	KIVLT
	(pos636=T)	Coverage: 1.00
CLASS 2:	MCVLT
	(pos636=C)	Coverage: 1.00
CLASS 3:	WUVLT
	(pos636=G)	Coverage: 1.00
OR
CLASS 1:	KIVLT
	(pos679=G)	Coverage: 1.00
CLASS 2:	MCVLT
	(pos679=T)	Coverage: 1.00
CLASS 3:	WUVLT
	(pos679=A)	Coverage: 1.00
OR
CLASS 1:	KIVLT
	(pos661=T)	Coverage: 1.00
CLASS 2:	MCVLT
	(pos661=C)	Coverage: 1.00
CLASS 3:	WUVLT
	(pos661=A)	Coverage: 1.00
OR
CLASS 1:	KIVLT
	(pos818=G)	Coverage: 1.00
CLASS 2:	MCVLT
	(pos818=C)	Coverage: 1.00
CLASS 3:	WUVLT
	(pos818=A)	Coverage: 1.00
OR
CLASS 1:	KIVLT
	(pos426=T)	Coverage: 1.00
CLASS 2:	MCVLT
	(pos426=C)	Coverage: 1.00
CLASS 3:	WUVLT
	(pos426=A)	Coverage: 1.00
OR
CLASS 1:	KIVLT
	(pos574=T)	Coverage: 1.00
CLASS 2:	MCVLT
	(pos574=A)	Coverage: 1.00
CLASS 3:	WUVLT
	(pos574=C)	Coverage: 1.00
OR
CLASS 1:	KIVLT
	(pos590=C)	Coverage: 1.00
CLASS 2:	MCVLT
	(pos590=G)	Coverage: 1.00
CLASS 3:	WUVLT
	(pos590=A)	Coverage: 1.00
OR
CLASS 1:	KIVLT
	(pos821=A)	Coverage: 1.00
CLASS 2:	MCVLT
	(pos821=C)	Coverage: 1.00
CLASS 3:	WUVLT
	(pos821=T)	Coverage: 1.00
OR
CLASS 1:	KIVLT
	(pos649=A)	Coverage: 1.00
CLASS 2:	MCVLT
	(pos649=T)	Coverage: 1.00
CLASS 3:	WUVLT
	(pos649=C)	Coverage: 1.00
OR
CLASS 1:	KIVLT
	(pos366=A)	Coverage: 1.00
CLASS 2:	MCVLT
	(pos366=C)	Coverage: 1.00
CLASS 3:	WUVLT
	(pos366=T)	Coverage: 1.00
OR
CLASS 1:	KIVLT
	(pos644=G)	Coverage: 1.00
CLASS 2:	MCVLT
	(pos644=A)	Coverage: 1.00
CLASS 3:	WUVLT
	(pos644=T)	Coverage: 1.00
OR
CLASS 1:	KIVLT
	(pos241=C)	Coverage: 1.00
CLASS 2:	MCVLT
	(pos241=G)	Coverage: 1.00
CLASS 3:	WUVLT
	(pos241=A)	Coverage: 1.00
OR
CLASS 1:	KIVLT
	(pos666=A)	Coverage: 1.00
CLASS 2:	MCVLT
	(pos666=G)	Coverage: 1.00
CLASS 3:	WUVLT
	(pos666=T)	Coverage: 1.00
OR
CLASS 1:	KIVLT
	(pos570=T)	Coverage: 1.00
CLASS 2:	MCVLT
	(pos570=C)	Coverage: 1.00
CLASS 3:	WUVLT
	(pos570=A)	Coverage: 1.00
OR
CLASS 1:	KIVLT
	(pos367=C)	Coverage: 1.00
CLASS 2:	MCVLT
	(pos367=T)	Coverage: 1.00
CLASS 3:	WUVLT
	(pos367=A)	Coverage: 1.00
OR
CLASS 1:	KIVLT
	(pos484=A)	Coverage: 1.00
CLASS 2:	MCVLT
	(pos484=G)	Coverage: 1.00
CLASS 3:	WUVLT
	(pos484=T)	Coverage: 1.00
OR
CLASS 1:	KIVLT
	(pos285=G)	Coverage: 1.00
CLASS 2:	MCVLT
	(pos285=A)	Coverage: 1.00
CLASS 3:	WUVLT
	(pos285=C)	Coverage: 1.00
OR
CLASS 1:	KIVLT
	(pos565=C)	Coverage: 1.00
CLASS 2:	MCVLT
	(pos565=G)	Coverage: 1.00
CLASS 3:	WUVLT
	(pos565=T)	Coverage: 1.00
OR
CLASS 1:	KIVLT
	(pos772=C)	Coverage: 1.00
CLASS 2:	MCVLT
	(pos772=G)	Coverage: 1.00
CLASS 3:	WUVLT
	(pos772=T)	Coverage: 1.00
OR
CLASS 1:	KIVLT
	(pos391=C)	Coverage: 1.00
CLASS 2:	MCVLT
	(pos391=A)	Coverage: 1.00
CLASS 3:	WUVLT
	(pos391=G)	Coverage: 1.00
OR
CLASS 1:	KIVLT
	(pos779=G)	Coverage: 1.00
CLASS 2:	MCVLT
	(pos779=A)	Coverage: 1.00
CLASS 3:	WUVLT
	(pos779=T)	Coverage: 1.00
OR
CLASS 1:	KIVLT
	(pos782=T)	Coverage: 1.00
CLASS 2:	MCVLT
	(pos782=A)	Coverage: 1.00
CLASS 3:	WUVLT
	(pos782=G)	Coverage: 1.00
OR
CLASS 1:	KIVLT
	(pos378=G)	Coverage: 1.00
CLASS 2:	MCVLT
	(pos378=C)	Coverage: 1.00
CLASS 3:	WUVLT
	(pos378=T)	Coverage: 1.00
OR
CLASS 1:	KIVLT
	(pos621=A)	Coverage: 1.00
CLASS 2:	MCVLT
	(pos621=C)	Coverage: 1.00
CLASS 3:	WUVLT
	(pos621=T)	Coverage: 1.00
OR
CLASS 1:	KIVLT
	(pos482=G)	Coverage: 1.00
CLASS 2:	MCVLT
	(pos482=C)	Coverage: 1.00
CLASS 3:	WUVLT
	(pos482=A)	Coverage: 1.00
OR
CLASS 1:	KIVLT
	(pos760=G)	Coverage: 1.00
CLASS 2:	MCVLT
	(pos760=T)	Coverage: 1.00
CLASS 3:	WUVLT
	(pos760=A)	Coverage: 1.00
OR
CLASS 1:	KIVLT
	(pos688=T)	Coverage: 1.00
CLASS 2:	MCVLT
	(pos688=C)	Coverage: 1.00
CLASS 3:	WUVLT
	(pos688=A)	Coverage: 1.00
OR
CLASS 1:	KIVLT
	(pos539=T)	Coverage: 1.00
CLASS 2:	MCVLT
	(pos539=G)	Coverage: 1.00
CLASS 3:	WUVLT
	(pos539=C)	Coverage: 1.00
OR
CLASS 1:	KIVLT
	(pos814=T)	Coverage: 1.00
CLASS 2:	MCVLT
	(pos814=C)	Coverage: 1.00
CLASS 3:	WUVLT
	(pos814=A)	Coverage: 1.00
OR
CLASS 1:	KIVLT
	(pos376=G)	Coverage: 1.00
CLASS 2:	MCVLT
	(pos376=T)	Coverage: 1.00
CLASS 3:	WUVLT
	(pos376=A)	Coverage: 1.00
OR
CLASS 1:	KIVLT
	(pos431=C)	Coverage: 1.00
CLASS 2:	MCVLT
	(pos431=G)	Coverage: 1.00
CLASS 3:	WUVLT
	(pos431=A)	Coverage: 1.00
OR
CLASS 1:	KIVLT
	(pos552=A)	Coverage: 1.00
CLASS 2:	MCVLT
	(pos552=C)	Coverage: 1.00
CLASS 3:	WUVLT
	(pos552=G)	Coverage: 1.00
OR
CLASS 1:	KIVLT
	(pos453=G)	Coverage: 1.00
CLASS 2:	MCVLT
	(pos453=C)	Coverage: 1.00
CLASS 3:	WUVLT
	(pos453=A)	Coverage: 1.00
OR
CLASS 1:	KIVLT
	(pos500=G)	Coverage: 1.00
CLASS 2:	MCVLT
	(pos500=A)	Coverage: 1.00
CLASS 3:	WUVLT
	(pos500=T)	Coverage: 1.00
OR
CLASS 1:	KIVLT
	(pos639=A)	Coverage: 1.00
CLASS 2:	MCVLT
	(pos639=C)	Coverage: 1.00
CLASS 3:	WUVLT
	(pos639=T)	Coverage: 1.00
OR
CLASS 1:	KIVLT
	(pos97=C)	Coverage: 1.00
CLASS 2:	MCVLT
	(pos97=G)	Coverage: 1.00
CLASS 3:	WUVLT
	(pos97=A)	Coverage: 1.00
OR
CLASS 1:	KIVLT
	(pos794=A)	Coverage: 1.00
CLASS 2:	MCVLT
	(pos794=C)	Coverage: 1.00
CLASS 3:	WUVLT
	(pos794=T)	Coverage: 1.00
OR
CLASS 1:	KIVLT
	(pos724=T)	Coverage: 1.00
CLASS 2:	MCVLT
	(pos724=C)	Coverage: 1.00
CLASS 3:	WUVLT
	(pos724=G)	Coverage: 1.00
OR
CLASS 1:	KIVLT
	(pos563=A)	Coverage: 1.00
CLASS 2:	MCVLT
	(pos563=G)	Coverage: 1.00
CLASS 3:	WUVLT
	(pos563=T)	Coverage: 1.00
OR
CLASS 1:	KIVLT
	(pos55=T)	Coverage: 1.00
CLASS 2:	MCVLT
	(pos55=A)	Coverage: 1.00
CLASS 3:	WUVLT
	(pos55=C)	Coverage: 1.00
OR
CLASS 1:	KIVLT
	(pos631=A)	Coverage: 1.00
CLASS 2:	MCVLT
	(pos631=G)	Coverage: 1.00
CLASS 3:	WUVLT
	(pos631=C)	Coverage: 1.00
OR
CLASS 1:	KIVLT
	(pos758=G)	Coverage: 1.00
CLASS 2:	MCVLT
	(pos758=C)	Coverage: 1.00
CLASS 3:	WUVLT
	(pos758=T)	Coverage: 1.00
OR
CLASS 1:	KIVLT
	(pos527=A)	Coverage: 1.00
CLASS 2:	MCVLT
	(pos527=G)	Coverage: 1.00
CLASS 3:	WUVLT
	(pos527=T)	Coverage: 1.00
OR
CLASS 1:	KIVLT
	(pos533=A)	Coverage: 1.00
CLASS 2:	MCVLT
	(pos533=G)	Coverage: 1.00
CLASS 3:	WUVLT
	(pos533=T)	Coverage: 1.00
OR
CLASS 1:	KIVLT
	(pos554=T)	Coverage: 1.00
CLASS 2:	MCVLT
	(pos554=A)	Coverage: 1.00
CLASS 3:	WUVLT
	(pos554=C)	Coverage: 1.00
OR
CLASS 1:	KIVLT
	(pos727=A)	Coverage: 1.00
CLASS 2:	MCVLT
	(pos727=C)	Coverage: 1.00
CLASS 3:	WUVLT
	(pos727=G)	Coverage: 1.00
OR
CLASS 1:	KIVLT
	(pos712=C)	Coverage: 1.00
CLASS 2:	MCVLT
	(pos712=A)	Coverage: 1.00
CLASS 3:	WUVLT
	(pos712=T)	Coverage: 1.00
OR
CLASS 1:	KIVLT
	(pos321=G)	Coverage: 1.00
CLASS 2:	MCVLT
	(pos321=T)	Coverage: 1.00
CLASS 3:	WUVLT
	(pos321=A)	Coverage: 1.00
OR
CLASS 1:	KIVLT
	(pos811=T)	Coverage: 1.00
CLASS 2:	MCVLT
	(pos811=A)	Coverage: 1.00
CLASS 3:	WUVLT
	(pos811=G)	Coverage: 1.00
OR
CLASS 1:	KIVLT
	(pos777=A)	Coverage: 1.00
CLASS 2:	MCVLT
	(pos777=G)	Coverage: 1.00
CLASS 3:	WUVLT
	(pos777=T)	Coverage: 1.00
OR
CLASS 1:	KIVLT
	(pos690=A)	Coverage: 1.00
CLASS 2:	MCVLT
	(pos690=T)	Coverage: 1.00
CLASS 3:	WUVLT
	(pos690=G)	Coverage: 1.00
OR
CLASS 1:	KIVLT
	(pos408=G)	Coverage: 1.00
CLASS 2:	MCVLT
	(pos408=C)	Coverage: 1.00
CLASS 3:	WUVLT
	(pos408=A)	Coverage: 1.00
OR
CLASS 1:	KIVLT
	(pos549=G)	Coverage: 1.00
CLASS 2:	MCVLT
	(pos549=C)	Coverage: 1.00
CLASS 3:	WUVLT
	(pos549=A)	Coverage: 1.00
OR
CLASS 1:	KIVLT
	(pos643=A)	Coverage: 1.00
CLASS 2:	MCVLT
	(pos643=G)	Coverage: 1.00
CLASS 3:	WUVLT
	(pos643=T)	Coverage: 1.00
OR
CLASS 1:	KIVLT
	(pos258=T)	Coverage: 1.00
CLASS 2:	MCVLT
	(pos258=G)	Coverage: 1.00
CLASS 3:	WUVLT
	(pos258=C)	Coverage: 1.00
OR
CLASS 1:	KIVLT
	(pos823=C)	Coverage: 1.00
CLASS 2:	MCVLT
	(pos823=T)	Coverage: 1.00
CLASS 3:	WUVLT
	(pos823=A)	Coverage: 1.00
OR
CLASS 1:	KIVLT
	(pos483=T)	Coverage: 1.00
CLASS 2:	MCVLT
	(pos483=C)	Coverage: 1.00
CLASS 3:	WUVLT
	(pos483=A)	Coverage: 1.00
OR
CLASS 1:	KIVLT
	(pos667=G)	Coverage: 1.00
CLASS 2:	MCVLT
	(pos667=C)	Coverage: 1.00
CLASS 3:	WUVLT
	(pos667=A)	Coverage: 1.00
OR
CLASS 1:	KIVLT
	(pos471=T)	Coverage: 1.00
CLASS 2:	MCVLT
	(pos471=G)	Coverage: 1.00
CLASS 3:	WUVLT
	(pos471=A)	Coverage: 1.00
OR
CLASS 1:	KIVLT
	(pos752=A)	Coverage: 1.00
CLASS 2:	MCVLT
	(pos752=C)	Coverage: 1.00
CLASS 3:	WUVLT
	(pos752=G)	Coverage: 1.00
OR
CLASS 1:	KIVLT
	(pos577=A)	Coverage: 1.00
CLASS 2:	MCVLT
	(pos577=C)	Coverage: 1.00
CLASS 3:	WUVLT
	(pos577=T)	Coverage: 1.00
OR
CLASS 1:	KIVLT
	(pos680=T)	Coverage: 1.00
CLASS 2:	MCVLT
	(pos680=C)	Coverage: 1.00
CLASS 3:	WUVLT
	(pos680=A)	Coverage: 1.00
OR
CLASS 1:	KIVLT
	(pos707=A)	Coverage: 1.00
CLASS 2:	MCVLT
	(pos707=C)	Coverage: 1.00
CLASS 3:	WUVLT
	(pos707=G)	Coverage: 1.00
OR
CLASS 1:	KIVLT
	(pos283=G)	Coverage: 1.00
CLASS 2:	MCVLT
	(pos283=A)	Coverage: 1.00
CLASS 3:	WUVLT
	(pos283=T)	Coverage: 1.00
OR
CLASS 1:	KIVLT
	(pos806=A)	Coverage: 1.00
CLASS 2:	MCVLT
	(pos806=C)	Coverage: 1.00
CLASS 3:	WUVLT
	(pos806=T)	Coverage: 1.00
OR
CLASS 1:	KIVLT
	(pos427=G)	Coverage: 1.00
CLASS 2:	MCVLT
	(pos427=T)	Coverage: 1.00
CLASS 3:	WUVLT
	(pos427=A)	Coverage: 1.00
OR
CLASS 1:	KIVLT
	(pos560=A)	Coverage: 1.00
CLASS 2:	MCVLT
	(pos560=G)	Coverage: 1.00
CLASS 3:	WUVLT
	(pos560=C)	Coverage: 1.00
OR
CLASS 1:	KIVLT
	(pos211=G)	Coverage: 1.00
CLASS 2:	MCVLT
	(pos211=A)	Coverage: 1.00
CLASS 3:	WUVLT
	(pos211=C)	Coverage: 1.00
OR
CLASS 1:	KIVLT
	(pos413=A)	Coverage: 1.00
CLASS 2:	MCVLT
	(pos413=G)	Coverage: 1.00
CLASS 3:	WUVLT
	(pos413=C)	Coverage: 1.00
OR
CLASS 1:	KIVLT
	(pos388=T)	Coverage: 1.00
CLASS 2:	MCVLT
	(pos388=C)	Coverage: 1.00
CLASS 3:	WUVLT
	(pos388=G)	Coverage: 1.00
OR
CLASS 1:	KIVLT
	(pos456=A)	Coverage: 1.00
CLASS 2:	MCVLT
	(pos456=G)	Coverage: 1.00
CLASS 3:	WUVLT
	(pos456=T)	Coverage: 1.00
OR
CLASS 1:	KIVLT
	(pos815=T)	Coverage: 1.00
CLASS 2:	MCVLT
	(pos815=C)	Coverage: 1.00
CLASS 3:	WUVLT
	(pos815=A)	Coverage: 1.00
OR
CLASS 1:	KIVLT
	(pos374=A)	Coverage: 1.00
CLASS 2:	MCVLT
	(pos374=C)	Coverage: 1.00
CLASS 3:	WUVLT
	(pos374=G)	Coverage: 1.00
OR
CLASS 1:	KIVLT
	(pos699=A)	Coverage: 1.00
CLASS 2:	MCVLT
	(pos699=C)	Coverage: 1.00
CLASS 3:	WUVLT
	(pos699=T)	Coverage: 1.00
OR
CLASS 1:	KIVLT
	(pos522=A)	Coverage: 1.00
CLASS 2:	MCVLT
	(pos522=C)	Coverage: 1.00
CLASS 3:	WUVLT
	(pos522=T)	Coverage: 1.00
OR
CLASS 1:	KIVLT
	(pos494=T)	Coverage: 1.00
CLASS 2:	MCVLT
	(pos494=C)	Coverage: 1.00
CLASS 3:	WUVLT
	(pos494=A)	Coverage: 1.00
OR
CLASS 1:	KIVLT
	(pos689=T)	Coverage: 1.00
CLASS 2:	MCVLT
	(pos689=C)	Coverage: 1.00
CLASS 3:	WUVLT
	(pos689=A)	Coverage: 1.00
OR
CLASS 1:	KIVLT
	(pos481=A)	Coverage: 1.00
CLASS 2:	MCVLT
	(pos481=C)	Coverage: 1.00
CLASS 3:	WUVLT
	(pos481=G)	Coverage: 1.00
OR
CLASS 1:	KIVLT
	(pos776=G)	Coverage: 1.00
CLASS 2:	MCVLT
	(pos776=A)	Coverage: 1.00
CLASS 3:	WUVLT
	(pos776=C)	Coverage: 1.00
OR
CLASS 1:	KIVLT
	(pos711=C)	Coverage: 1.00
CLASS 2:	MCVLT
	(pos711=A)	Coverage: 1.00
CLASS 3:	WUVLT
	(pos711=T)	Coverage: 1.00
OR
CLASS 1:	KIVLT
	(pos605=T)	Coverage: 1.00
CLASS 2:	MCVLT
	(pos605=C)	Coverage: 1.00
CLASS 3:	WUVLT
	(pos605=G)	Coverage: 1.00
OR
CLASS 1:	KIVLT
	(pos345=A)	Coverage: 1.00
CLASS 2:	MCVLT
	(pos345=C)	Coverage: 1.00
CLASS 3:	WUVLT
	(pos345=T)	Coverage: 1.00
OR
CLASS 1:	KIVLT
	(pos713=C)	Coverage: 1.00
CLASS 2:	MCVLT
	(pos713=G)	Coverage: 1.00
CLASS 3:	WUVLT
	(pos713=T)	Coverage: 1.00
OR
CLASS 1:	KIVLT
	(pos152=G)	Coverage: 1.00
CLASS 2:	MCVLT
	(pos152=T)	Coverage: 1.00
CLASS 3:	WUVLT
	(pos152=A)	Coverage: 1.00
OR
CLASS 1:	KIVLT
	(pos364=G)	Coverage: 1.00
CLASS 2:	MCVLT
	(pos364=T)	Coverage: 1.00
CLASS 3:	WUVLT
	(pos364=C)	Coverage: 1.00
OR
CLASS 1:	KIVLT
	(pos561=G)	Coverage: 1.00
CLASS 2:	MCVLT
	(pos561=A)	Coverage: 1.00
CLASS 3:	WUVLT
	not(pos561=A)	and	not(pos561=G)	Coverage: 1.00
OR
CLASS 1:	KIVLT
	(pos535=G)	Coverage: 1.00
CLASS 2:	MCVLT
	(pos535=A)	Coverage: 1.00
CLASS 3:	WUVLT
	(pos535=C)	Coverage: 1.00
OR
CLASS 1:	KIVLT
	(pos652=A)	Coverage: 1.00
CLASS 2:	MCVLT
	(pos652=C)	Coverage: 1.00
CLASS 3:	WUVLT
	(pos652=T)	Coverage: 1.00
OR
CLASS 1:	KIVLT
	(pos763=G)	Coverage: 1.00
CLASS 2:	MCVLT
	(pos763=C)	Coverage: 1.00
CLASS 3:	WUVLT
	(pos763=A)	Coverage: 1.00
OR
CLASS 1:	KIVLT
	(pos386=G)	Coverage: 1.00
CLASS 2:	MCVLT
	(pos386=C)	Coverage: 1.00
CLASS 3:	WUVLT
	(pos386=A)	Coverage: 1.00
OR
CLASS 1:	KIVLT
	(pos693=C)	Coverage: 1.00
CLASS 2:	MCVLT
	(pos693=G)	Coverage: 1.00
CLASS 3:	WUVLT
	(pos693=A)	Coverage: 1.00
OR
CLASS 1:	KIVLT
	(pos372=A)	Coverage: 1.00
CLASS 2:	MCVLT
	(pos372=T)	Coverage: 1.00
CLASS 3:	WUVLT
	(pos372=G)	Coverage: 1.00
OR
CLASS 1:	KIVLT
	(pos703=G)	Coverage: 1.00
CLASS 2:	MCVLT
	(pos703=T)	Coverage: 1.00
CLASS 3:	WUVLT
	(pos703=A)	Coverage: 1.00
OR
CLASS 1:	KIVLT
	(pos692=T)	Coverage: 1.00
CLASS 2:	MCVLT
	(pos692=A)	Coverage: 1.00
CLASS 3:	WUVLT
	(pos692=G)	Coverage: 1.00
OR
CLASS 1:	KIVLT
	(pos338=C)	Coverage: 1.00
CLASS 2:	MCVLT
	(pos338=G)	Coverage: 1.00
CLASS 3:	WUVLT
	(pos338=A)	Coverage: 1.00
OR
CLASS 1:	KIVLT
	(pos599=A)	Coverage: 1.00
CLASS 2:	MCVLT
	(pos599=G)	Coverage: 1.00
CLASS 3:	WUVLT
	(pos599=T)	Coverage: 1.00
OR
CLASS 1:	KIVLT
	(pos738=T)	Coverage: 1.00
CLASS 2:	MCVLT
	(pos738=C)	Coverage: 1.00
CLASS 3:	WUVLT
	(pos738=A)	Coverage: 1.00
OR
CLASS 1:	KIVLT
	(pos160=C)	Coverage: 1.00
CLASS 2:	MCVLT
	(pos160=G)	Coverage: 1.00
CLASS 3:	WUVLT
	(pos160=A)	Coverage: 1.00
OR
CLASS 1:	KIVLT
	(pos586=C)	Coverage: 1.00
CLASS 2:	MCVLT
	(pos586=A)	Coverage: 1.00
CLASS 3:	WUVLT
	(pos586=T)	Coverage: 1.00
OR
CLASS 1:	KIVLT
	(pos630=C)	Coverage: 1.00
CLASS 2:	MCVLT
	(pos630=G)	Coverage: 1.00
CLASS 3:	WUVLT
	(pos630=A)	Coverage: 1.00
OR
CLASS 1:	KIVLT
	(pos498=G)	Coverage: 1.00
CLASS 2:	MCVLT
	(pos498=A)	Coverage: 1.00
CLASS 3:	WUVLT
	(pos498=T)	Coverage: 1.00
OR
CLASS 1:	KIVLT
	(pos475=G)	Coverage: 1.00
CLASS 2:	MCVLT
	(pos475=A)	Coverage: 1.00
CLASS 3:	WUVLT
	(pos475=T)	Coverage: 1.00
OR
CLASS 1:	KIVLT
	(pos479=T)	Coverage: 1.00
CLASS 2:	MCVLT
	(pos479=G)	Coverage: 1.00
CLASS 3:	WUVLT
	(pos479=A)	Coverage: 1.00
OR
CLASS 1:	KIVLT
	(pos731=G)	Coverage: 1.00
CLASS 2:	MCVLT
	(pos731=C)	Coverage: 1.00
CLASS 3:	WUVLT
	(pos731=A)	Coverage: 1.00
OR
CLASS 1:	KIVLT
	(pos540=T)	Coverage: 1.00
CLASS 2:	MCVLT
	(pos540=A)	Coverage: 1.00
CLASS 3:	WUVLT
	(pos540=C)	Coverage: 1.00
OR
CLASS 1:	KIVLT
	(pos663=C)	Coverage: 1.00
CLASS 2:	MCVLT
	(pos663=T)	Coverage: 1.00
CLASS 3:	WUVLT
	(pos663=A)	Coverage: 1.00
OR
CLASS 1:	KIVLT
	(pos432=T)	Coverage: 1.00
CLASS 2:	MCVLT
	(pos432=G)	Coverage: 1.00
CLASS 3:	WUVLT
	(pos432=A)	Coverage: 1.00
OR
CLASS 1:	KIVLT
	(pos722=T)	Coverage: 1.00
CLASS 2:	MCVLT
	(pos722=G)	Coverage: 1.00
CLASS 3:	WUVLT
	(pos722=A)	Coverage: 1.00
OR
CLASS 1:	KIVLT
	(pos234=T)	Coverage: 1.00
CLASS 2:	MCVLT
	(pos234=G)	Coverage: 1.00
CLASS 3:	WUVLT
	(pos234=A)	Coverage: 1.00
OR
CLASS 1:	KIVLT
	(pos381=T)	Coverage: 1.00
CLASS 2:	MCVLT
	(pos381=G)	Coverage: 1.00
CLASS 3:	WUVLT
	(pos381=A)	Coverage: 1.00
OR
CLASS 1:	KIVLT
	(pos620=T)	Coverage: 1.00
CLASS 2:	MCVLT
	(pos620=G)	Coverage: 1.00
CLASS 3:	WUVLT
	(pos620=A)	Coverage: 1.00
OR
CLASS 1:	KIVLT
	(pos203=G)	Coverage: 1.00
CLASS 2:	MCVLT
	(pos203=A)	Coverage: 1.00
CLASS 3:	WUVLT
	(pos203=C)	Coverage: 1.00
OR
CLASS 1:	KIVLT
	(pos322=T)	Coverage: 1.00
CLASS 2:	MCVLT
	(pos322=G)	Coverage: 1.00
CLASS 3:	WUVLT
	(pos322=C)	Coverage: 1.00
OR
CLASS 1:	KIVLT
	(pos656=A)	Coverage: 1.00
CLASS 2:	MCVLT
	(pos656=C)	Coverage: 1.00
CLASS 3:	WUVLT
	(pos656=G)	Coverage: 1.00
OR
CLASS 1:	KIVLT
	(pos418=G)	Coverage: 1.00
CLASS 2:	MCVLT
	(pos418=A)	Coverage: 1.00
CLASS 3:	WUVLT
	(pos418=C)	Coverage: 1.00
OR
CLASS 1:	KIVLT
	(pos795=A)	Coverage: 1.00
CLASS 2:	MCVLT
	(pos795=C)	Coverage: 1.00
CLASS 3:	WUVLT
	(pos795=T)	Coverage: 1.00
OR
CLASS 1:	KIVLT
	(pos39=A)	Coverage: 1.00
CLASS 2:	MCVLT
	(pos39=C)	Coverage: 1.00
CLASS 3:	WUVLT
	(pos39=T)	Coverage: 1.00
OR
CLASS 1:	KIVLT
	(pos111=G)	Coverage: 1.00
CLASS 2:	MCVLT
	(pos111=C)	Coverage: 1.00
CLASS 3:	WUVLT
	(pos111=A)	Coverage: 1.00
OR
CLASS 1:	KIVLT
	(pos700=G)	Coverage: 1.00
CLASS 2:	MCVLT
	(pos700=C)	Coverage: 1.00
CLASS 3:	WUVLT
	(pos700=A)	Coverage: 1.00
OR
CLASS 1:	KIVLT
	(pos442=C)	Coverage: 1.00
CLASS 2:	MCVLT
	(pos442=T)	Coverage: 1.00
CLASS 3:	WUVLT
	(pos442=G)	Coverage: 1.00
OR
CLASS 1:	KIVLT
	(pos686=T)	Coverage: 1.00
CLASS 2:	MCVLT
	(pos686=A)	Coverage: 1.00
CLASS 3:	WUVLT
	(pos686=G)	Coverage: 1.00
OR
CLASS 1:	KIVLT
	(pos551=T)	Coverage: 1.00
CLASS 2:	MCVLT
	(pos551=C)	Coverage: 1.00
CLASS 3:	WUVLT
	(pos551=A)	Coverage: 1.00
