# Supplementary material for: Human polyomaviruses identification by logic mining techniques
Source: Virol J. 2012 Mar 2;9:58. doi: 10.1186/1743-422X-9-58 (PMC3307486; doi:10.1186/1743-422X-9-58)
Supplement: Additional file 3 — Separating formulas for ST gene region. All the discriminating base pairs for the virus classification within the gene region ST. [file 1743-422X-9-58-S3.XLS]

## Sheet: ST
CLASS 1:	KIVST
	(pos11=A)	Coverage: 1.00
CLASS 2:	MCVST
	(pos11=T)	Coverage: 1.00
CLASS 3:	WUVST
	(pos11=C)	Coverage: 1.00
OR
CLASS 1:	KIVST
	(pos13=A)	Coverage: 1.00
CLASS 2:	MCVST
	(pos13=C)	Coverage: 1.00
CLASS 3:	WUVST
	(pos13=T)	Coverage: 1.00
OR
CLASS 1:	KIVST
	(pos17=G)	Coverage: 1.00
CLASS 2:	MCVST
	(pos17=A)	Coverage: 1.00
CLASS 3:	WUVST
	(pos17=C)	Coverage: 1.00
OR
CLASS 1:	KIVST
	(pos21=C)	Coverage: 1.00
CLASS 2:	MCVST
	(pos21=G)	Coverage: 1.00
CLASS 3:	WUVST
	(pos21=A)	Coverage: 1.00
OR
CLASS 1:	KIVST
	(pos24=G)	Coverage: 1.00
CLASS 2:	MCVST
	(pos24=A)	Coverage: 1.00
CLASS 3:	WUVST
	(pos24=T)	Coverage: 1.00
